# Supplementary material
Source: PubMed Central journal article supplement (PMC4120975)
Supplement: jp500767n_si_001.pdf [file jp500767n_si_001.pdf]

# Supporting Information

## An ESEEM Analysis of Multi-Histidine Coordination in Model Complexes, Peptides and Amyloid- $\beta$

K. Ishara Silva, Brian C. Michael, Steven J. Geib, Sunil Saxena\*

Department of Chemistry, University of Pittsburgh, PA 15260

sksaxena@pitt.edu

AUTHOR EMAIL ADDRESS sksaxena@pitt.edu

\* To whom correspondence should be addressed. Phone: (412) 624-8680. Fax: (412) 624-8611

E-mail: [sksaxena@pitt.edu](mailto:sksaxena@pitt.edu)

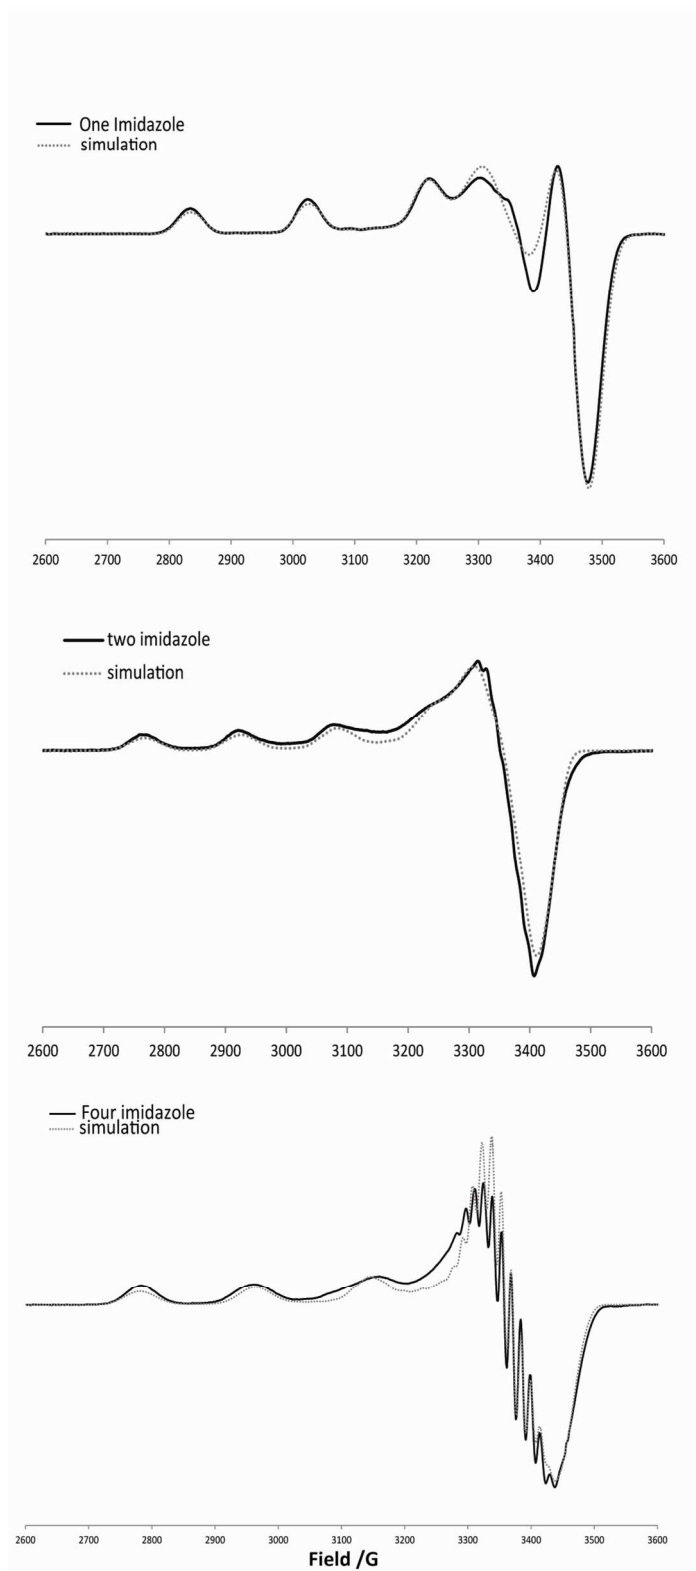

**Figure S1.** Simulated CW spectra for Cu(II) – imidazole complexes. Experimental spectra are shown in solid lines and simulated ones are shown in dashed.

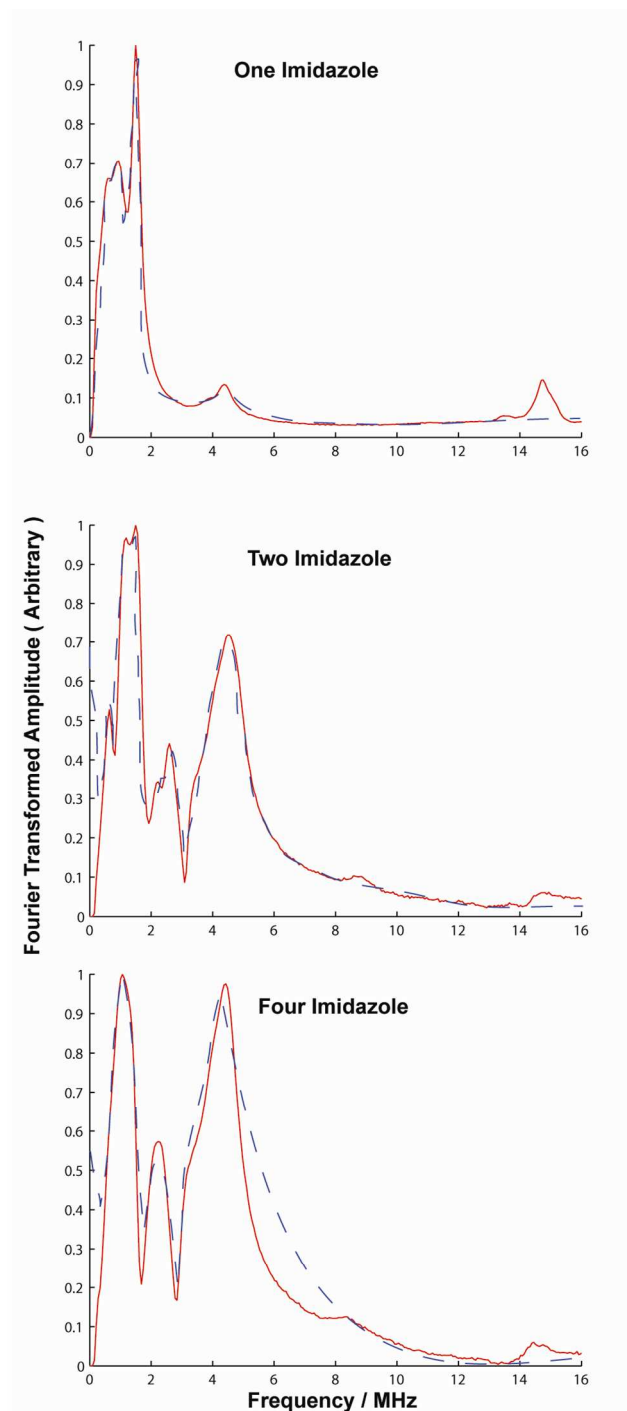

**Figure S2.** Experimentally obtained and simulated three-pulse ESEEM spectra of the model complexes

**Table S1.** Parameters used for ESEEM simulation in model complexes

| <b>Parameter</b> | <b>One Imidazole</b> | <b>Two Imidazole</b> | <b>Four Imidazole</b> |
|------------------|----------------------|----------------------|-----------------------|
| $\eta$           | 0.67±0.02            | 0.72±0.02            | 0.67±0.02             |
| $A_{\text{iso}}$ | 1.70±0.03            | 1.84±0.04            | 1.87±0.04             |
| $T_{\text{dip}}$ | 0.14±0.01            | 0.14±0.01            | 0.12±0.01             |
| $\alpha$         | 75°±5                | 60°±5                | 45°±5                 |
| $\beta$          | 90°±5                | 30°±5                | 30°±5                 |
| $\kappa$         | 1.59                 | 1.64                 | 2.80                  |

### Error calculation in ESEEM

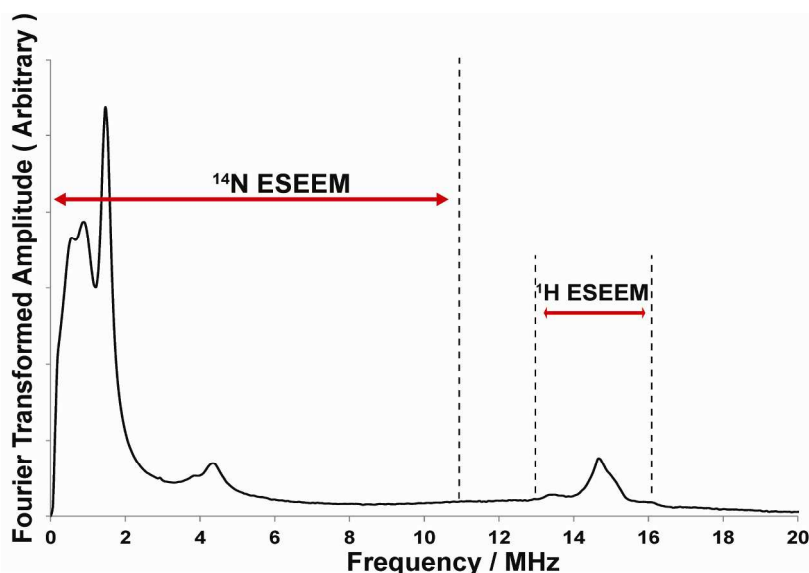

**Figure S3.** Regions used to calculate the integrated intensities of  $^{14}\text{N}$ -ESEEM and  $^1\text{H}$ -ESEEM

1. The frequency region from 20 MHz – 30 MHz was used to calculate the standard deviation of the baseline. (s)
2. Then, the sum of the region from 0 – 11 MHz was calculated for  $^{14}\text{N}$ -ESEEM. The error was calculated using the standard deviation from the step 1. The number of points used for the integration is given as “n”. (For  $^{14}\text{N}$ -ESEEM region  $n = 145$ )

$$\text{Sum}_{^{14}\text{N ESEEM}} \pm \sqrt{n} \times s^2$$

3. Same procedure was used to calculate the integration intensity (for 13 – 16 MHz region) and the error for the  $^1\text{H}$ -ESEEM regions. The number of points (n) used was 50.
4. The propagation of error was used to calculate the final error associated with the  $^{14}\text{N}$ -ESEEM/ $^1\text{H}$ -ESEEM.

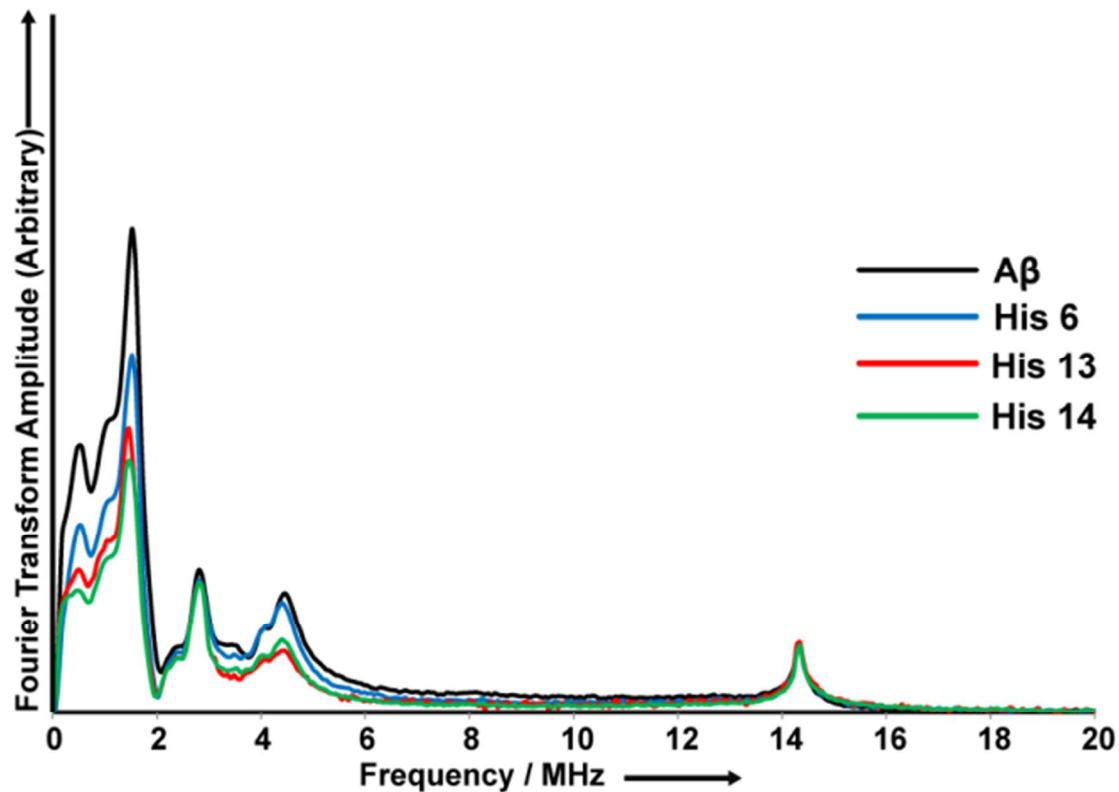

**Figure S4.** Three-pulse ESEEM spectra of the nonlabeled and single  $^{15}\text{N}$  labeled  $\text{A}\beta(1 - 16)$  variants mixed with equimolar amounts of  $\text{Cu}(\text{II})$  and  $\text{Zn}(\text{II})$  at 3355 G at pH 8.7. The decrease in intensity below 8 MHz in  $^{15}\text{N}$  labeled  $\text{A}\beta(1 - 16)$  variants gives the contribution of each histidine residue for component I in  $\text{A}\beta(1 - 16)\text{-Cu}(\text{II})$ .

**Table S2** : Relative integrated intensities of ESEEM spectra of the nonlabeled and  $^{15}\text{N}$ - double labeled  $\text{A}\beta(1 - 16)$  variants at pH 8.7 mixed with an equimolar amount of  $\text{Cu}(\text{II})$  at the  $^{14}\text{N}$ -ESEEM region (0 – 11 MHz) and  $^1\text{H}$ -ESEEM region (13 – 16 MHz) and the relative contribution from each histidine residue

| Sample           | $^{14}\text{N}$ -ESEEM | $^1\text{H}$ -ESEEM | $^{14}\text{N}/^1\text{H}$ | % involvement |
|------------------|------------------------|---------------------|----------------------------|---------------|
| $\text{A}\beta$  | $10767 \pm 7$          | $951 \pm 5$         | $11.32 \pm 0.1$            |               |
| <b>His 6,13</b>  | $4270 \pm 7$           | $950 \pm 5$         | $4.49 \pm 0.1$             | $39.6 \pm 1$  |
| <b>His 6,14</b>  | $4313 \pm 7$           | $950 \pm 5$         | $4.54 \pm 0.1$             | $40.1 \pm 1$  |
| <b>His 13,14</b> | $2795 \pm 7$           | $950 \pm 5$         | $2.94 \pm 0.1$             | $25.9 \pm 1$  |

**Table S3** : Relative integrated intensities of ESEEM spectra of the nonlabeled and  $^{15}\text{N}$ - single labeled  $\text{A}\beta(1 - 16)$  variants at pH 8.7 mixed with an equimolar amount of  $\text{Cu}(\text{II})$  at the  $^{14}\text{N}$ -ESEEM region (0 – 11 MHz) and  $^1\text{H}$ -ESEEM region (13 – 16 MHz) and the relative contribution from each histidine residue

| Sample          | $^{14}\text{N}$ -ESEEM | $^1\text{H}$ -ESEEM | $^{14}\text{N}/^1\text{H}$ | % reduction    |
|-----------------|------------------------|---------------------|----------------------------|----------------|
| $\text{A}\beta$ | $5847 \pm 4$           | $515 \pm 3$         | $11.35 \pm 0.07$           |                |
| <b>His 6</b>    | $4673 \pm 3$           | $508 \pm 2$         | $9.20 \pm 0.04$            | $18.9 \pm 0.7$ |
| <b>His 13</b>   | $3329 \pm 5$           | $500 \pm 4$         | $6.66 \pm 0.05$            | $41.3 \pm 0.8$ |
| <b>His 14</b>   | $3431 \pm 3$           | $466 \pm 2$         | $7.36 \pm 0.03$            | $35.1 \pm 0.7$ |
